# Supplementary material for: Pleiotropic Roles of Scavenger Receptors in Circadian Retinal Phagocytosis: A New Function for Lysosomal SR-B2/LIMP-2 at the RPE Cell Surface
Source: MDPI journal article supplement (doi:10.3390/ijms23073445), 2022-03-22
Supplement: s1 [file s1]

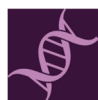

## Supplementary Materials

**Supplementary Table S1.** Name, reference, species and dilutions corresponding to the antibodies used in our various experiments as indicated. Monoclonal antibodies are specified as mAb and clone numbers are indicated in brackets, when available. ROS: Rod outer segments. Antibodies used for ICC on live cells before fixation are diluted 1:50. \* Antibodies used for blocking experiments.

| Antibody     | Reference/s                         | Species        | ICC    | IHC   | WB      | Rafts WB |
|--------------|-------------------------------------|----------------|--------|-------|---------|----------|
| Actin        | Abcam ab3280 [ACTN05 (C4)]          | mouse mAb      | —      | —     | —       | 1:100    |
| Caveolin     | BD Transduction Laboratories 610060 | rabbit         | 1:1000 | —     | —       | —        |
|              | Abcam ab2910                        | rabbit         | —      | —     | —       | 1:500    |
| CD36         | R&D Systems AF2519 *                | goat           | 1:50   | —     | 1:800   | —        |
|              | Novus Biologicals NB400-144         | rabbit         | —      | 1:200 | —       | 1:500    |
| Ezrin        | Sigma E8897 [3C12]                  | mouse mAb      | 1:500  | —     | —       | —        |
| Flotillin-1  | BD Transduction Laboratories 610820 | mouse mAb      | 1:200  | —     | —       | 1:1,000  |
| MARCO        | R&D Systems AF2956                  | goat           | 1:50   | —     | 1:500   | —        |
|              | Biorbyt orb6345 *                   | rabbit         | —      | 1:200 | —       | —        |
| Rhodopsin    | Millipore MAB5316 [RET-P1]          | mouse mAb      | 1:300  | —     | —       | —        |
| ROS          | kind gift from Michael Hall         | rabbit ascites | 1:300  | —     | —       | —        |
| SR-AI        | R&D Systems AF1797 *                | goat           | 1:50   | 1:200 | —       | —        |
|              | Abcam ab151707 [EPR7536]            | rabbit mAb     | —      | —     | 1:800   | 1:250    |
| SR-BI        | Abcam ab52629 [EP1556Y]             | rabbit mAb     | 1:50   | 1:200 | 1:500   | 1:500    |
|              | Novus Biologicals NB400-101 *       | rabbit         | —      | —     | —       | —        |
| SR-B2/LIMP-2 | R&D Systems AF1888 *                | goat           | 1:50   | 1:200 | 1:3,000 | 1:3,000  |
| WGA-FITC     | Sigma L4895                         | —              | 1:250  | —     | —       | —        |
| ZO-1         | Invitrogen 61-7300                  | rabbit         | 1:300  | —     | —       | —        |
|              | eBioscience 14-9776 [R26.4C]        | rat mAb        | 1:300  | —     | —       | —        |

**Supplementary Table S2.** Mouse gene names and corresponding forward (F) and reverse (R) primer sequences.

| Gene                               |   | 5'-3' Sequence        |
|------------------------------------|---|-----------------------|
| Mouse <i>CD36</i>                  | F | CAAAGAGGTCCTTACACATAC |
|                                    | R | TGTGAAGTTGTCATCCTCTGT |
| Mouse <i>Marco</i>                 | F | GTCAGCAGTTCAACAACCTC  |
|                                    | R | CCTTTTCTCCCTTCTCAGCA  |
| Mouse <i>Msr1</i> [SR-AI]          | F | TGAACGAGAGGATGCTGACTG |
|                                    | R | GGAGGGGCCATTTTGTAGTGC |
| Mouse <i>Scarb1</i> [SR-BI]        | F | CAGAATGTCAGCACCTGCAG  |
|                                    | R | GTGACCGGATGGATGTCTAG  |
| Mouse <i>Scarb2</i> [SR-B2/LIMP-2] | F | TTACCAAGCCGACGAGAAGT  |
|                                    | R | ACCAAGCCAAAGAACACACC  |
| Mouse <i>RPLP0</i>                 | F | CCTGAAGTGCTCGACATCAC  |
|                                    | R | TGCCAGGACGCGCTTGTAC   |

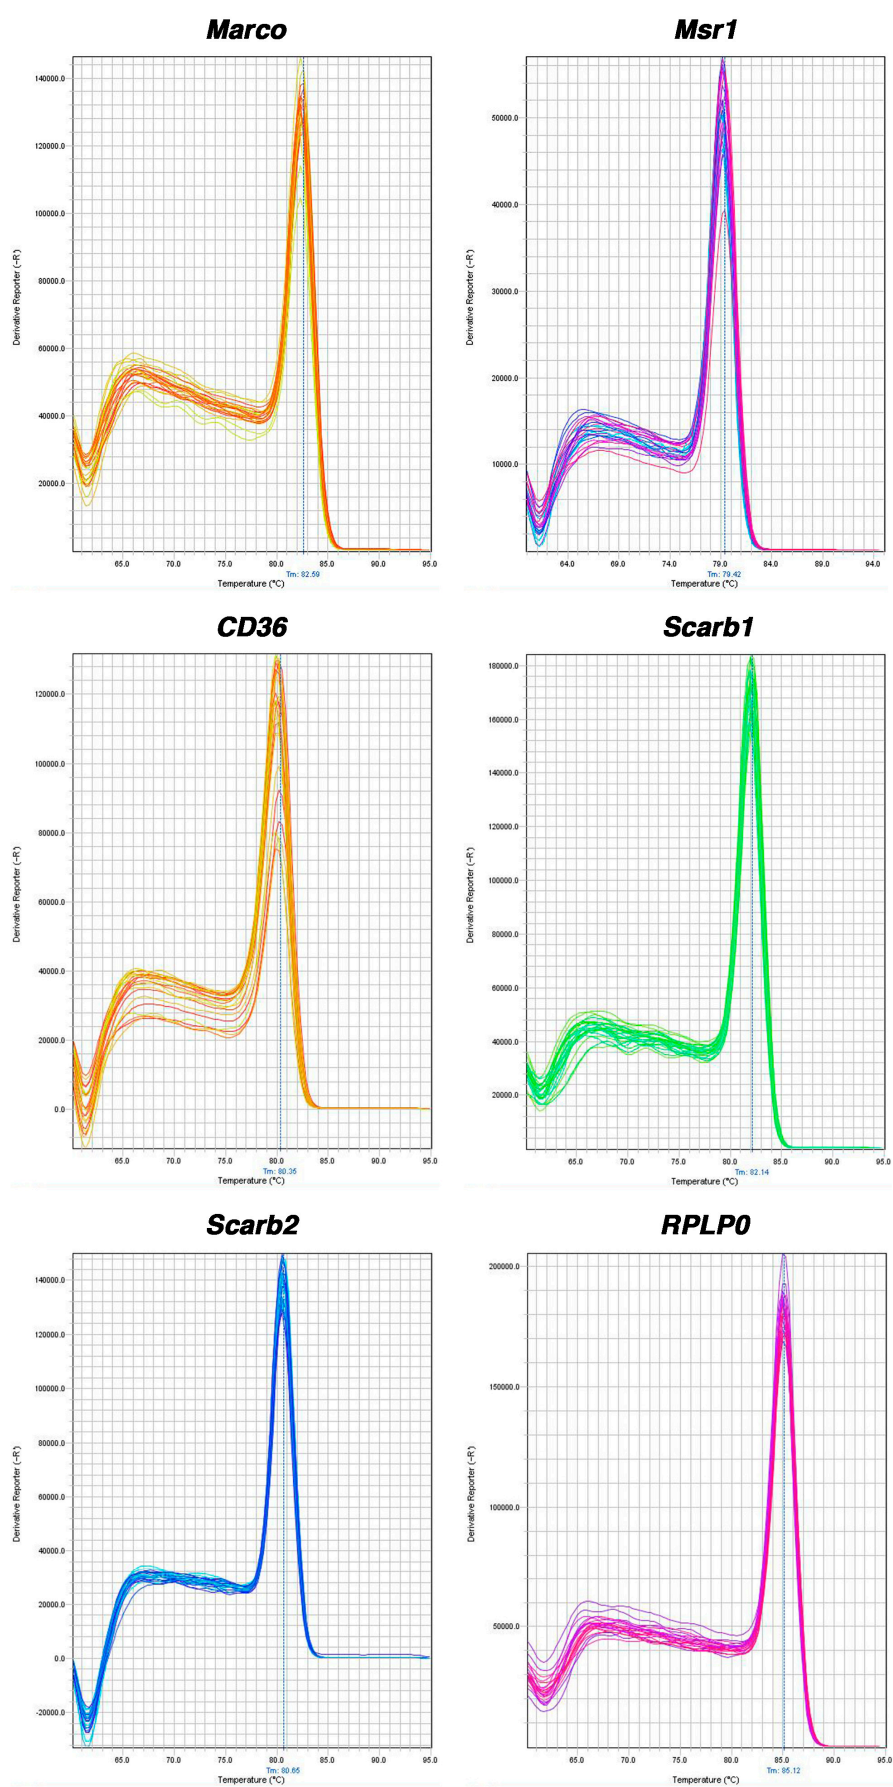

**Supplementary Figure S1.** Typical melting curves of qPCR primer pairs for each gene as indicated.
